# Supplementary material
Source: MDPI journal article supplement (https://www.mdpi.com/2071-1050/13/6/3272)
Supplement: s1 [file s1]

## SUPPLEMENTARY MATERIALS

Article

### Surface and underground geomechanical characterization of an area affected by instability phenomena in Zaruma mining zone (Ecuador)

Supplementary Materials:

**Supplementary Material 1.** Parameters used for the susceptibility assessment [65–69].

| Parameter              | Rock characteristics and conditions                                                                                                               | Category | Weight    |
|------------------------|---------------------------------------------------------------------------------------------------------------------------------------------------|----------|-----------|
| <b>Lithology</b>       | Strong and competent rock                                                                                                                         | I        | 0.0       |
|                        | Rock somewhat weathered and with some weathering degree                                                                                           | II       | 1.0       |
|                        | Deteriorated rock (saprolite type) that preserves matrix characteristics                                                                          | III      | 2.0       |
|                        | Very deteriorated saprolites                                                                                                                      | IV       | 3.0       |
|                        | Very erodible residual soils                                                                                                                      | V        | 4.0       |
| <b>Structures</b>      | Favorable slope position concerning weakening planes                                                                                              | I        | 0.5       |
|                        | Slope position somewhat favorable concerning weakening planes                                                                                     | II       | 1.5 – 2.0 |
|                        | Weakness planes favor land-slide                                                                                                                  | III      | 2.5 – 3.0 |
|                        | Weakness planes create conditions very favourable to landslide                                                                                    | IV       | 4.0       |
| <b>Morphometry</b>     | Very little slope                                                                                                                                 | I        | 0.0       |
|                        | Gentle or medium slope                                                                                                                            | II       | 1.0       |
|                        | Middle slope                                                                                                                                      | III      | 2.0       |
|                        | High slope                                                                                                                                        | IV       | 3.0       |
|                        | Very high slope                                                                                                                                   | V        | 4.0       |
| <b>Discontinuities</b> | Spacing between discontinuities spacing more significant than 2.0 m, openings less than 0.1 mm (practically closed). Non-weathered discontinuity. | I        | 0.0       |
|                        | 60 cm to 2.0 m spacing, 0.1 to 0.5 m discontinuity opening. Discontinuity somewhat affected.                                                      | II       | 1.0       |
|                        | 20 cm to 60 cm spacing, 0.5 to 1.0 m discontinuity opening. Discontinuity somewhat affected.                                                      | III      | 2.0       |
|                        | 6.0 cm to 20 cm spacing, 1.0 to 5.0 m discontinuity opening. Discontinuity affected.                                                              | IV       | 3.0       |
|                        | Spacing between discontinuities less than 6 cm, aperture greater than 50mm. Discontinuity affected.                                               | V        | 4.0       |
| <b>Water</b>           | There is no presence of water (neither surface nor underground).                                                                                  | I        | 0.0       |
|                        | Very little surface waters action. There is some groundwater influence.                                                                           | II       | 0.5       |
|                        | There is an appreciable surface water action. There is groundwater presence.                                                                      | III      | 1.0       |
|                        | There are significant surface water and groundwater presence.                                                                                     | IV       | 2.0       |
|                        | There is a lot of influence from surface water and groundwater.                                                                                   | V        | 3.0       |
| <b>Vegetable cover</b> | The slope is totally covered by an adequate vegetation cover.                                                                                     | I        | 0.0       |
|                        | The slope is largely covered by adequate vegetation cover.                                                                                        | II       | 0.5       |
|                        | The slope is only partially covered by adequate vegetation cover                                                                                  | III      | 1.5       |
|                        | There is little vegetation cover                                                                                                                  | IV       | 2.5       |
|                        | There is no vegetation cover, the slope is completely denuded.                                                                                    | V        | 3.0       |
| <b>Seismic</b>         | There is practically no seismicity.                                                                                                               | I        | 0.0       |
|                        | It is considered very low seismic action $a_s=(0.2 \text{ a } 0.5)g$                                                                              | II       | 1.0       |
|                        | Low seismicity $a_s=(0.5 \text{ a } 0.10)g$                                                                                                       | III      | 2.0       |
|                        | It is considered a medium seismicity $a_s=(0.10 \text{ a } 0.14)g$                                                                                | IV       | 2.5       |
|                        | High seismicity $a_s=(0.14 \text{ a } 0.18)g$                                                                                                     | V        | 3.5       |

|                        |                                                 |     |     |
|------------------------|-------------------------------------------------|-----|-----|
|                        | Very high seismicity $a_s > 0.18g$              | VI  | 4.0 |
| <b>Weathering Rank</b> | Soils that are practically without being eroded | I   | 0.0 |
|                        | Soils with little erosion                       | II  | 0.5 |
|                        | Soils with medium erosion                       | III | 1.0 |
|                        | Soils with a significant erosion process        | IV  | 2.0 |
|                        | Eroded soil                                     | V   | 3.0 |
|                        | Very eroded soil                                | VI  | 4.0 |

**Supplementary Material 2.** Descriptions and ratings for the Jr, Jn, Ja y Jw parameters [34].

| <b>Joint roughness number (Jr)</b>                                  |                                                                                    | <b>Value</b> |
|---------------------------------------------------------------------|------------------------------------------------------------------------------------|--------------|
| (a) Rock wall contact and (b) Rock wall contact before 10 cm shear. | A. Discontinuos joints                                                             | 4            |
|                                                                     | B. Rough or irregular, undulating                                                  | 3            |
|                                                                     | C. Smooth, undulating                                                              | 2            |
|                                                                     | D. Slickensided, undulating                                                        | 1.5          |
|                                                                     | E. Rough or irregular, planar                                                      | 1.5          |
|                                                                     | F. Smooth, planar                                                                  | 1.0          |
|                                                                     | G. Slickensided, planar                                                            | 0.5          |
| (c) No rock wall contacts when sheared                              | H. Zone containing clay minerals thick enough to prevent rock wall contact         | 1.0          |
|                                                                     | J. Sandy, enough to prevent rock wall contact                                      | 1.0          |
| <b>Joint set number (Jn)</b>                                        |                                                                                    |              |
|                                                                     | A. Massive rock                                                                    | 0.5 – 1.0    |
|                                                                     | B. One family of joints                                                            | 2            |
|                                                                     | C. One family of joints with other occasional joints                               | 3            |
|                                                                     | D. Two families of joints                                                          | 4            |
|                                                                     | E. Two families of joints with other occasional joints                             | 5            |
|                                                                     | F. Three families of joints                                                        | 9            |
|                                                                     | G. Three families of joints with other occasional joints                           | 12           |
|                                                                     | H. Four or more families, highly fractured rock                                    | 15           |
|                                                                     | J. Crushed rock                                                                    | 20           |
| <b>Joint alteration number (Ja)</b>                                 |                                                                                    |              |
|                                                                     | Sound-walled joints                                                                | 0.75 – 1.0   |
|                                                                     | Slight alteration                                                                  | 2            |
|                                                                     | Clay alterations                                                                   | 4            |
|                                                                     | With gritty detritus                                                               | 4            |
|                                                                     | With pre consolidated clay detritus                                                | 6            |
|                                                                     | With unconsolidated clayey detritus                                                | 8            |
|                                                                     | With Expansive clay detritus                                                       | 8 – 12       |
|                                                                     | Rock and clay mylonites                                                            | 5 – 12       |
|                                                                     | Smooth clay mylonites                                                              | 5            |
|                                                                     | Coarse clayey mylonites                                                            | 10 – 20      |
| <b>Joint water reduction factor (Jw)</b>                            |                                                                                    |              |
|                                                                     | A. Dry excavations or minor inflow, i.e. <5l/min. locally                          | 1.0          |
|                                                                     | B. Medium inflow or pressure occasional outwash of joint fillings                  | 0.66         |
|                                                                     | C. Large inflow or high pressure in competent rock with unfilled joints            | 0.5          |
|                                                                     | D. Large inflow or high pressure, considerable outwash of joint fillings           | 0.33         |
|                                                                     | E. Exceptionally high inflow or water pressure at blasting, decaying with time     | 0.2 – 0.1    |
|                                                                     | F. Exceptionally high inflow or water pressure continuing without noticeable decay | 0.1 – 0.05   |

**Supplementary Material 3.** Descriptions and ratings for the C.D., Cw, Co, Cs y Cb parameters [35].

| <b>Joint orientation (Co)</b>    |                                              |     |     |     |       |
|----------------------------------|----------------------------------------------|-----|-----|-----|-------|
| No. of joints defining the block | No. of faces inclined away from the vertical |     |     |     |       |
|                                  | 70%                                          | 75% | 80% | 85% | 90%   |
| 3                                | 3                                            |     | 2   |     |       |
| 4                                | 4                                            | 3   |     | 2   |       |
| 5                                | 5                                            | 4   | 3   | 2   | 1     |
| 6                                | 6                                            | 5   | 4   | 3   | 2 – 1 |

  

| <b>Blasting Effects (Cb)</b> |                |
|------------------------------|----------------|
| Technique                    | Adjustment (%) |
| Boring                       | 100            |
| Smooth-wall blasting         | 97             |
| Good conventional blasting   | 94             |
| Poor blasting                | 80             |

  

| <b>Weathering (Cw)</b> |                                    |        |         |         |           |
|------------------------|------------------------------------|--------|---------|---------|-----------|
| Degree of weathering   | Exposure period and adjustments, % |        |         |         |           |
|                        | ½ year                             | 1 year | 2 years | 3 years | 4 + years |
| Fresh                  | 100                                | 100    | 100     | 100     | 100       |
| Slight                 | 88                                 | 90     | 92      | 94      | 96        |
| Moderate               | 82                                 | 84     | 86      | 88      | 90        |
| Hihg                   | 70                                 | 72     | 74      | 76      | 78        |
| Complete               | 56                                 | 56     | 58      | 60      | 62        |
| Residual soil          | 30                                 | 32     | 34      | 36      | 38        |

  

| <b>Tensiones inducidas por actividad minera (Cs)</b> |                |
|------------------------------------------------------|----------------|
| Causa                                                | Adjustment (%) |
| The joints are in compression                        | 120            |
| Risk of a cutting movement                           | 90             |
| Open and thin-filled fissures                        | 76             |
| Major cutting movements                              | 60             |
